# Supplementary material for: Flavonoids as Potential anti-MRSA Agents through Modulation of PBP2a: A Computational and Experimental Study
Source: PubMed Central journal article supplement (PMC7559925; doi:10.3390/antibiotics9090562), 2020-08-31
Supplement: antibiotics-09-00562-s001.pdf [file antibiotics-09-00562-s001.pdf]

## Supplemental Material

### **Flavonoids as Potential anti-MRSA Agents through Modulation of PBP2a: A Computational and Experimental Study.**

Hani A. Alhadrami <sup>1,2</sup>, Ahmed A. Hamed <sup>3</sup>, Hossam M. Hassan <sup>4</sup>, Lassaad Belbahri <sup>5</sup>, Mostafa E. Rateb <sup>6, \*</sup>, Ahmed M. Sayed <sup>7, \*</sup>

<sup>1</sup> Faculty of Applied Medical Sciences, Department of Medical Laboratory Technology, King Abdulaziz University, P. O. Box 80402, Jeddah, 21589, Kingdom of Saudi Arabi,

<sup>2</sup> King Fahd Medical Research Centre, King Abdulaziz University, P. O. Box 80402, Jeddah, 21589, Kingdom of Saudi Arabia, [hanialhadrami@kau.edu.sa](mailto:hanialhadrami@kau.edu.sa) (HAA)

<sup>3</sup> Microbial Chemistry Department, National Research Centre, 33 El-Buhouth Street, P.O. Box 12622, Dokki, Giza, Egypt, [ahmedshalbio@gmail.com](mailto:ahmedshalbio@gmail.com) (AAH)

<sup>4</sup> Department of Pharmacognosy, Faculty of Pharmacy, Beni-Suef University, Beni-Suef 62514, Egypt, [abuh20050@yahoo.com](mailto:abuh20050@yahoo.com) (HMH)

<sup>5</sup> Laboratory of Soil Biology, University of Neuchatel, 2000 Neuchatel, Switzerland, [lassaad.belbahri@unine.ch](mailto:lassaad.belbahri@unine.ch) (LB)

<sup>6</sup> School of Computing, Engineering & Physical Sciences, University of the West of Scotland, Paisley PA1 2BE, UK,

<sup>7</sup> Department of Pharmacognosy, Faculty of Pharmacy, Nahda University, Beni-Suef 62513, Egypt.

\* Correspondence: [Mostafa.Rateb@uws.ac.uk](mailto:Mostafa.Rateb@uws.ac.uk) (MER) and [Ahmed.Mohamed.Sayed@nub.edu.eg](mailto:Ahmed.Mohamed.Sayed@nub.edu.eg) (AMS).

**Table S1.** List of the potential anti-MRSA targets suggested by idTarget.

| Target name                                        | Target PDB ID    | Predicted for           | Biological activity              | $\Delta G_{vina}$ kcal/mol* |
|----------------------------------------------------|------------------|-------------------------|----------------------------------|-----------------------------|
| Penicillin-Binding Protein 2a (PBP2a) <sup>a</sup> | 4DKI, 6Q9N, 3ZfZ | Compounds: 2-11, 17     | Cell wall synthesis              | -8.9, -8.8, -7.5            |
| D-alanine-D-alanine ligase (Ddl)                   | 3N8D             | Compounds :1, 2, 14     | Cell wall synthesis              | -9.6                        |
| DNA gyrase-B (Gyr-B)                               | 5D6P             | Compounds: 1, 2, 3, 7-9 | Negative supercoiling of the DNA | -9.2                        |

\*Binding energy scores of the co-crystallized ligands of each protein after the re-docking by Audodock Vina.

<sup>a</sup>PBP2a was selected as the most possible target because it was the best-predicted protein (predicted for 10 compounds of 20), particularly, the flavonoids.

**Table S2.** List of compounds that predicted to be possible inhibitors for certain Staphylococcal protein target.

| Compound name                | $\Delta G^*$ kcal/mol     | $\Delta G_{vina}^{**}$ kcal/mol (Active site) | $\Delta G_{vina}^{**}$ kcal/mol (Allosteric site) | Chemical class | Subclass                 |
|------------------------------|---------------------------|-----------------------------------------------|---------------------------------------------------|----------------|--------------------------|
| Myricetin (1)                | -                         | < -7.0                                        | -7.0                                              | Phenolics      | Flavonoid                |
| Quercetin (2)                | -7.1                      | -7.2                                          | -7.2                                              | Phenolics      | Flavonoid                |
| Kaempferol (3)               | -7.8                      | -7.6                                          | < -7.0                                            | Phenolics      | Flavonoid                |
| Apigenin (4)                 | -7.8                      | -8.1                                          | < -7.0                                            | Phenolics      | Flavonoid                |
| Chrysin (5)                  | -7.0                      | -7.9                                          | < -7.0                                            | Phenolics      | Flavonoid                |
| Hesperetin (6)               | -7.3                      | -7.8                                          | -7.2                                              | Phenolics      | Flavonoid                |
| Astragalin (7)               | -8.3                      | -9.0                                          | -8.2                                              | Phenolics      | Flavonoid                |
| kaempferol 7-O-glucoside (8) | -8.2                      | -9.1                                          | -7.9                                              | Phenolics      | Flavonoid                |
| Quercitrin (9)               | -8.3                      | -9.0                                          | -8.1                                              | Phenolics      | Flavonoid                |
| Rutin (10)                   | -8.2, (-7.9) <sup>#</sup> | -9.4                                          | -8.8                                              | Phenolics      | Flavonoid                |
| Diosmin (11)                 | -8.5, (-9.1) <sup>#</sup> | -9.6                                          | -9.8                                              | Phenolics      | Flavonoid                |
| Hesperidin (12)              | -8.4, (-9.5) <sup>#</sup> | -9.5                                          | -10.3                                             | Phenolics      | Flavonoid                |
| Silibinin A (13)             | -8.0                      | -8.8                                          | -9.5                                              | Phenolics      | Flavonolignan            |
| Resveratrol (14)             | > -7.0                    | > -7.0                                        | > -7.0                                            | Phenolics      | Stilbene                 |
| Caffeic acid (15)            | > -7.0                    | > -7.0                                        | > -7.0                                            | Phenolics      | Cinnamic acid derivative |
| Sinapic acid (16)            | > -7.0                    | > -7.0                                        | > -7.0                                            | Phenolics      | Cinnamic acid derivative |
| Rosmarinic acid (17)         | -7.2                      | > -7.0                                        | > -7.0                                            | Phenolics      | Cinnamic acid derivative |
| Gallic acid (18)             | > -7.0                    | > -7.0                                        | > -7.0                                            | Phenolics      | Benzoic acid derivative  |
| Syringic acid (19)           | > -7.0                    | > -7.0                                        | > -7.0                                            | Phenolics      | Benzoic acid derivative  |
| Trimethoxy benzoic acid (20) | > -7.0                    | > -7.0                                        | > -7.0                                            | Phenolics      | Benzoic acid derivative  |
| Gentisic acid (21)           | > -7.0                    | > -7.0                                        | > -7.0                                            | Phenolics      | Benzoic acid derivative  |
| Benzyle anisate (22)         | > -7.0                    | > -7.0                                        | > -7.0                                            | Phenolics      | Benzoic acid derivative  |

\*Binding energy predicted by idTarget.

\*\*Binding energy predicted by Autodock Vina.

# Binding energy predicted by idTarget for the allosteric site

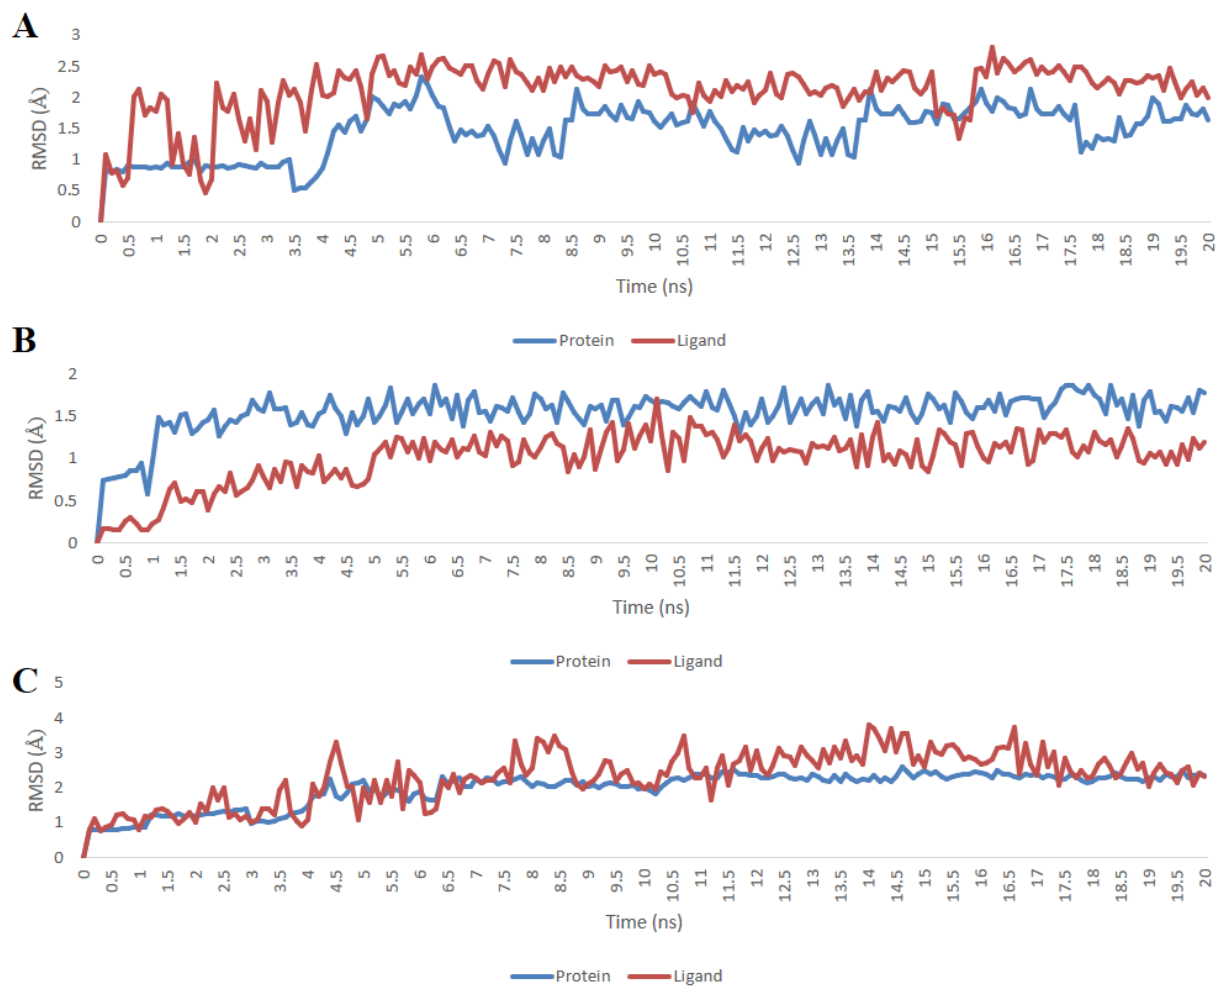

**Figure S1.** RMSDs of PBP2a-ligand complexes and the ligands. (A) Apigenin (4), (B) Chrysin (5), (C) Hesperetin (6).

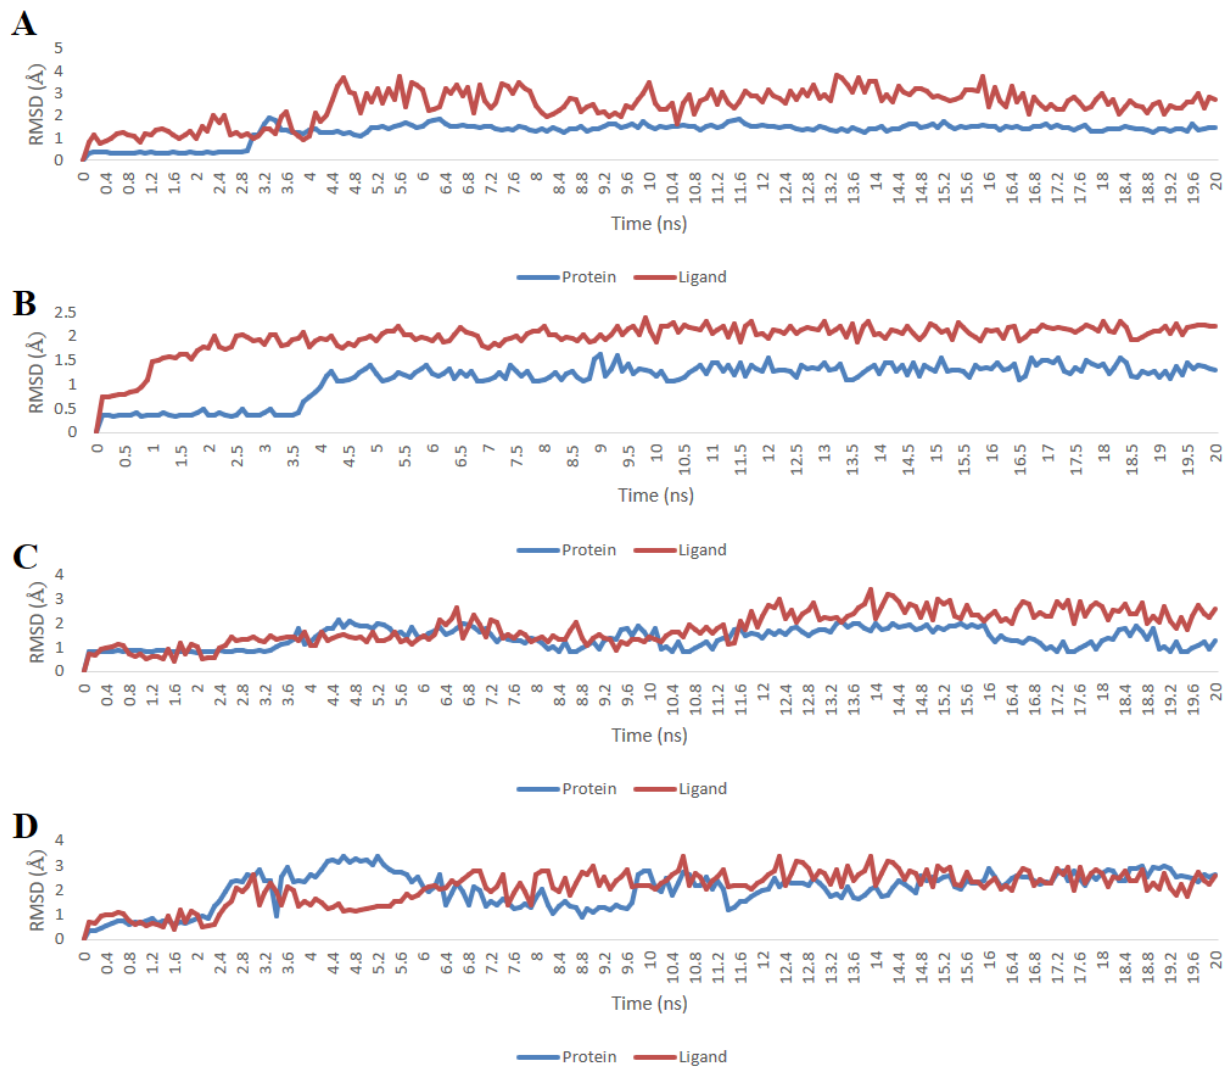

**Figure S2.** RMSDs of PBP2a-ligand complexes and the ligands. (A) Rutin (10), (B) Diosmin (11), (C) Hesperidin (12), (D) Slibinin A (13).
